# Supplementary material for: Smad4 regulates the nuclear translocation of Nkx2-5 in cardiac differentiation
Source: PubMed Central journal article supplement (PMC7878807; doi:10.1038/s41598-021-82954-2), 2021-02-11

Title: **Smad4 regulates the nuclear translocation of Nkx2-5 in cardiac differentiation**

Author names: Wenyu Hu<sup>1,2</sup>, Anqi Dong<sup>1</sup>, Kohei Karasaki<sup>1</sup>, Shota Sogabe<sup>1</sup>, Daiki Okamoto<sup>1</sup>,  
Masato Saigo<sup>1</sup>, Mari Ishida<sup>1</sup>, †Masao Yoshizumi<sup>1</sup>, and †Hiroki Kokubo<sup>1</sup>

Affiliations:<sup>1</sup>Department of Cardiovascular Physiology and Medicine, Graduate School of  
Biomedical and Health Sciences, Hiroshima University, 1-2-3 Kasumi, Minamiku, Hiroshima  
734-8551, Japan

<sup>2</sup>Department of Cardiology, the First Affiliated Hospital of China Medical University, Shenyang,  
Liaoning 110001, China

†For co-correspondence: Masao Yoshizumi and Hiroki Kokubo

[yoshizumi@umin.net](mailto:yoshizumi@umin.net) and [hkokubo@hiroshima-u.ac.jp](mailto:hkokubo@hiroshima-u.ac.jp)

Short title: **Smad4 regulates the nuclear localization of Nkx2-5**

**Supplemental Table S1. Primers used for Real-time PCR**

|                | Forward                      | Reverse                      |
|----------------|------------------------------|------------------------------|
| <i>Csnk2a1</i> | 5'-ACACTGTTGTGAAGGACCAGG-3'  | 5'-CATCAGAAGGTAGATGGGGGT-3'  |
| <i>Ppp1r3c</i> | 5'-GCTAATGGGAGGATCTTCTGG-3'  | 5'-GGTCAAGTTCTCCACTCTCCC-3'  |
| <i>Nkx2-5</i>  | 5'-GCTACAAGTGCAAGCGACAG-3'   | 5'-GGGTAGGCGTTGTAGCCATA-3'   |
| <i>Hcn4</i>    | 5'-CTCAACTCAGGCGTCTTCAAC-3'  | 5'-CCACCGAAGTAGTAGCAGCAG-3'  |
| <i>Mef2c</i>   | 5'-GTACACCGAGTACAACGAGC-3'   | 5'-CCTGTGTTACCTGCACTTGG-3'   |
| <i>Gata4</i>   | 5'-TCTCACTATGGGCACAGCAG-3'   | 5'-CGAGCAGGAATTTGAAGAGG-3'   |
| <i>Nppa</i>    | 5'-GAAGCAGCTGGATCTTCGTAG-3'  | 5'-TGTGTACAGTGCGGTGTCCAA-3'  |
| <i>Tnni2</i>   | 5'-CCAGCACTGCTGCACAGCA-3'    | 5'-AGACATGGAGCCTGGGATG-3'    |
| <i>Hey1</i>    | 5'-ACTTCCCCAGGGAATGTGTC-3'   | 5'-ATCGGAGTTTGGGGTTTCGG-3'   |
| <i>Hey2</i>    | 5'-GCAGCAGTGATGACATCCTC-3'   | 5'-GCAGAATCTGCATGGGCAAAC-3'  |
| <i>Gja5</i>    | 5'-TTCATCGTAGGCCAGTACCTC-3'  | 5'-CAGGTGGTAGAGTTCAGCCAG-3'  |
| <i>Gjal</i>    | 5'-CTGTACTTGGCTCAGGTGTTC-3'  | 5'-CACCTCTCATCTTCACCTTGC-3'  |
| <i>Tbx5</i>    | 5'-CTTCCCTACCAGCACTTCTCC-3'  | 5'-GTGTAGAGAACTCTGGGGGC-3'   |
| <i>Sfrp5</i>   | 5'-TGTGCTCCAGTGACTTTGTGG-3'  | 5'-TCAGGTTGTCTAACTGTGGGC-3'  |
| <i>Isl1</i>    | 5'-CACGACCAGTATATTCTGAGGG-3' | 5'-TCTCTCCACCACATCGTGGTC-3'  |
| <i>Tbx1</i>    | 5'-ACACCTGGCCGAGTACACTAC-3'  | 5'-ACTGTCTTTTCGAGGGTCCAC-3'  |
| <i>Tbx2</i>    | 5'-CCTGCTAATGGACATCGTGGC-3'  | 5'-CAAGATGTCATTGGCTCGCAC-3'  |
| <i>Tbx3</i>    | 5'-CATCGTCAGAGCCAACGATATC-3' | 5'-CCTCAAACACTCTCATGGAC-3'   |
| <i>Bmp2</i>    | 5'-CCAGGTTAGTGACTCAGAACAC-3' | 5'-TCATCTTGGTGCAAAGACCTGC-3' |
| <i>G3pdh</i>   | 5'-ACCACAGTCCATGCCATCAC-3'   | 5'-TCCACCACCCTGTTGCTGTA -3'  |

## Supplementary information

### Supplementary Figure S1. Morphology of *Smad4*-cKO and littermate control embryos.

Compared to the littermate control (*Sfrp5*<sup>Cre/+</sup>; *Smad4*<sup>del/+</sup>), *Smad4*-cKO (*Sfrp5*<sup>Cre/+</sup>; *Smad4*<sup>del/del</sup>)

hypoplastic heart tubes were formed with a clearly flawed looping shape in the severe phenotypes.

Scale bar=200  $\mu$ m.

### Supplementary Figure S2. *CK2* may not be a direct downstream target of *Smad4*.

(A) Relative expression of *CK2* in control and mutant embryonic hearts at E9.5 (n=9 and 7 for littermate control and *Smad4*-cKO, respectively). Data are presented as mean $\pm$ SEM. \* $P$ <0.05

(Mann-Whitney U test). (B) Whole-mount ISH analysis using a *CK2* antisense probe in control

and *Smad4*-cKO embryos at E9.5. (C) Schematic of reporter plasmids used in the luciferase assay.

The genomic region of the *CK2* gene, which contains prospective *Smad4*-binding sites upstream of the transcription starting site of *CK2*, was inserted into the Luc reporter vector, pGL-basic

(*CK2* -Pst1-Luc and *CK2* -EcoR1-Luc). (D) Luciferase assay. In order to clarify the relationship

between Bmp signaling and *CK2*, Alk6KR (dominant-negative form), Alk6QD (activated form),

*Smad5*, and/or empty vector (pDEF) were transfected together with reporter plasmids into

NIH3T3 cells as indicated. Statistical analysis was performed by one-way ANOVA, with Tukey-

Kramer *post hoc* analysis for multiple comparisons. n=3 for each group. Data are presented as

mean $\pm$ SEM.

**Supplementary Figure S3. Mypt1 expression is not affected in *Smad4*-cKO hearts.**

Immunofluorescent staining using anti-Mypt1 (green) antibody on sagittal sections of control and *Smad4* mutant embryos. DAPI was used to stain nuclei.

**Supplementary Figure S4. Bmp signaling via Smad4 may not be essential for *Ppp1r3c* expression.**

(A) Relative expression of *Ppp1r3c* in littermate control and *Smad4*-cKO embryonic hearts at E9.5. n=9 and 7 for control and *Smad4*-cKO, respectively. Data are presented as mean±SEM. (Mann-Whitney U test). (B) Whole-mount ISH with the probe for *Ppp1r3c*. Signal was detected in the hearts of control and *Smad4*-cKO embryos.

**Supplementary Figure S5. Raw images at different exposure times for Figure 3A.**

The immunoblotted membrane was contacted with a film in 5 min (A), 1 min (B), or 30 sec (C). Then the film was developed and scanned.

**Supplementary Figure S6. Raw images at different exposure times for Figure 3B.**

The immunoblotted membrane was directly scanned for 1 min (A), 5 min (B), 10 min (C), or 20 min (D).

**Supplementary Figure S7. Raw images at different exposure times for Figure 3C.**

The immunoblotted membrane was directly scanned for 30 sec (A), 1 min (B), 3 min (C), or 5 min (D).

**Supplementary Figure S8. Raw images at different exposure times for Figure 3D.**

The immunoblotted membrane was directly scanned for 1 min (A), 2 min (B), or 3 min (C).

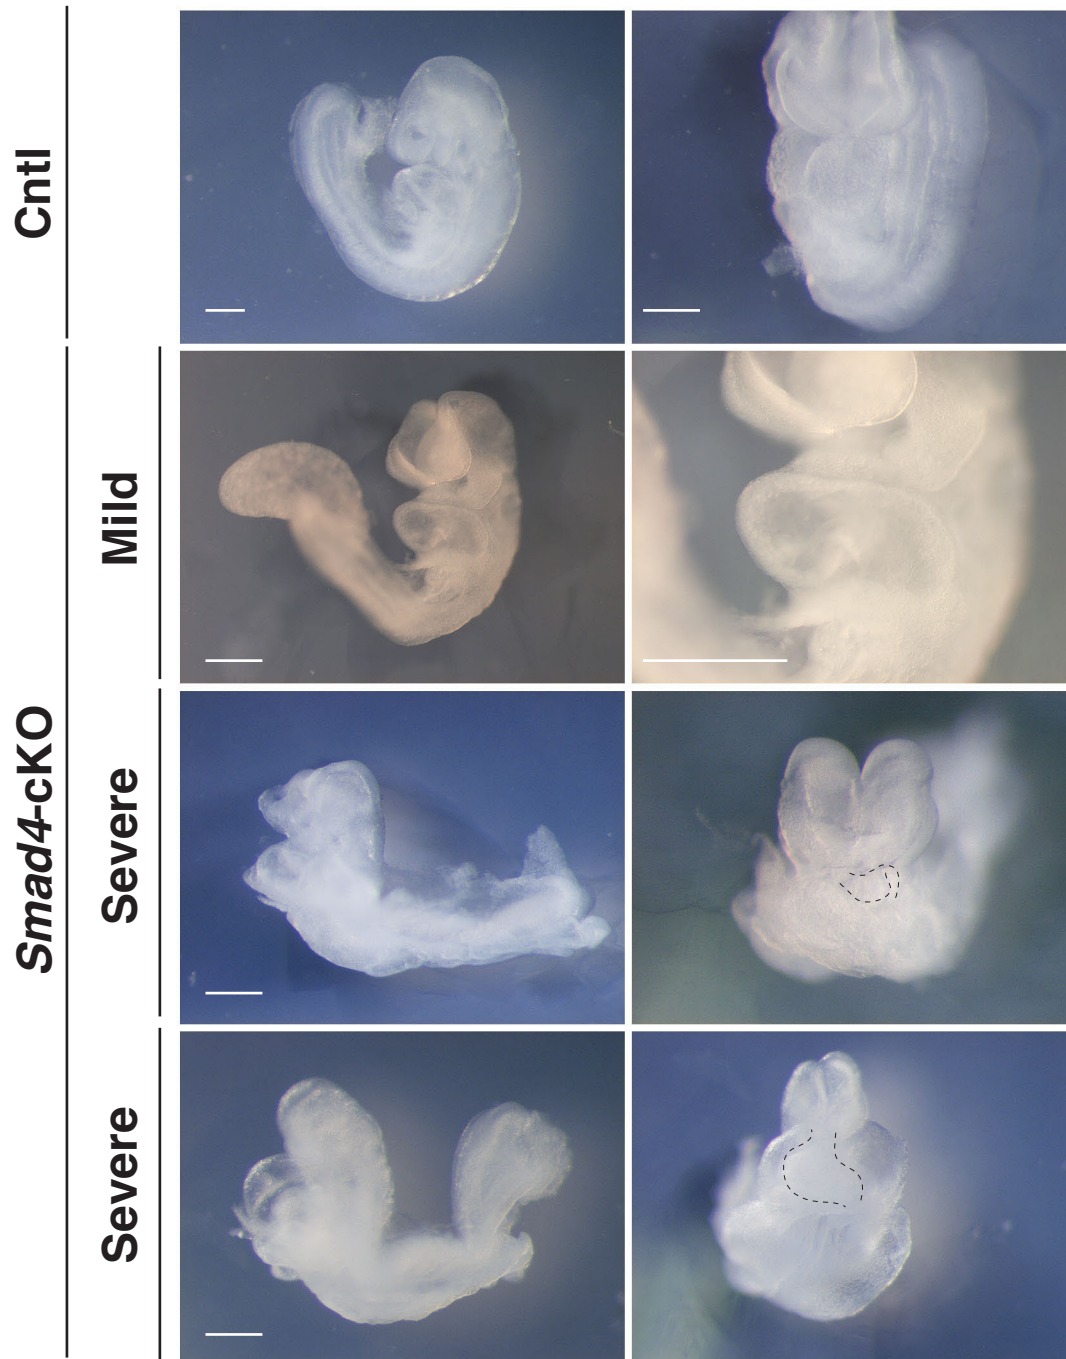

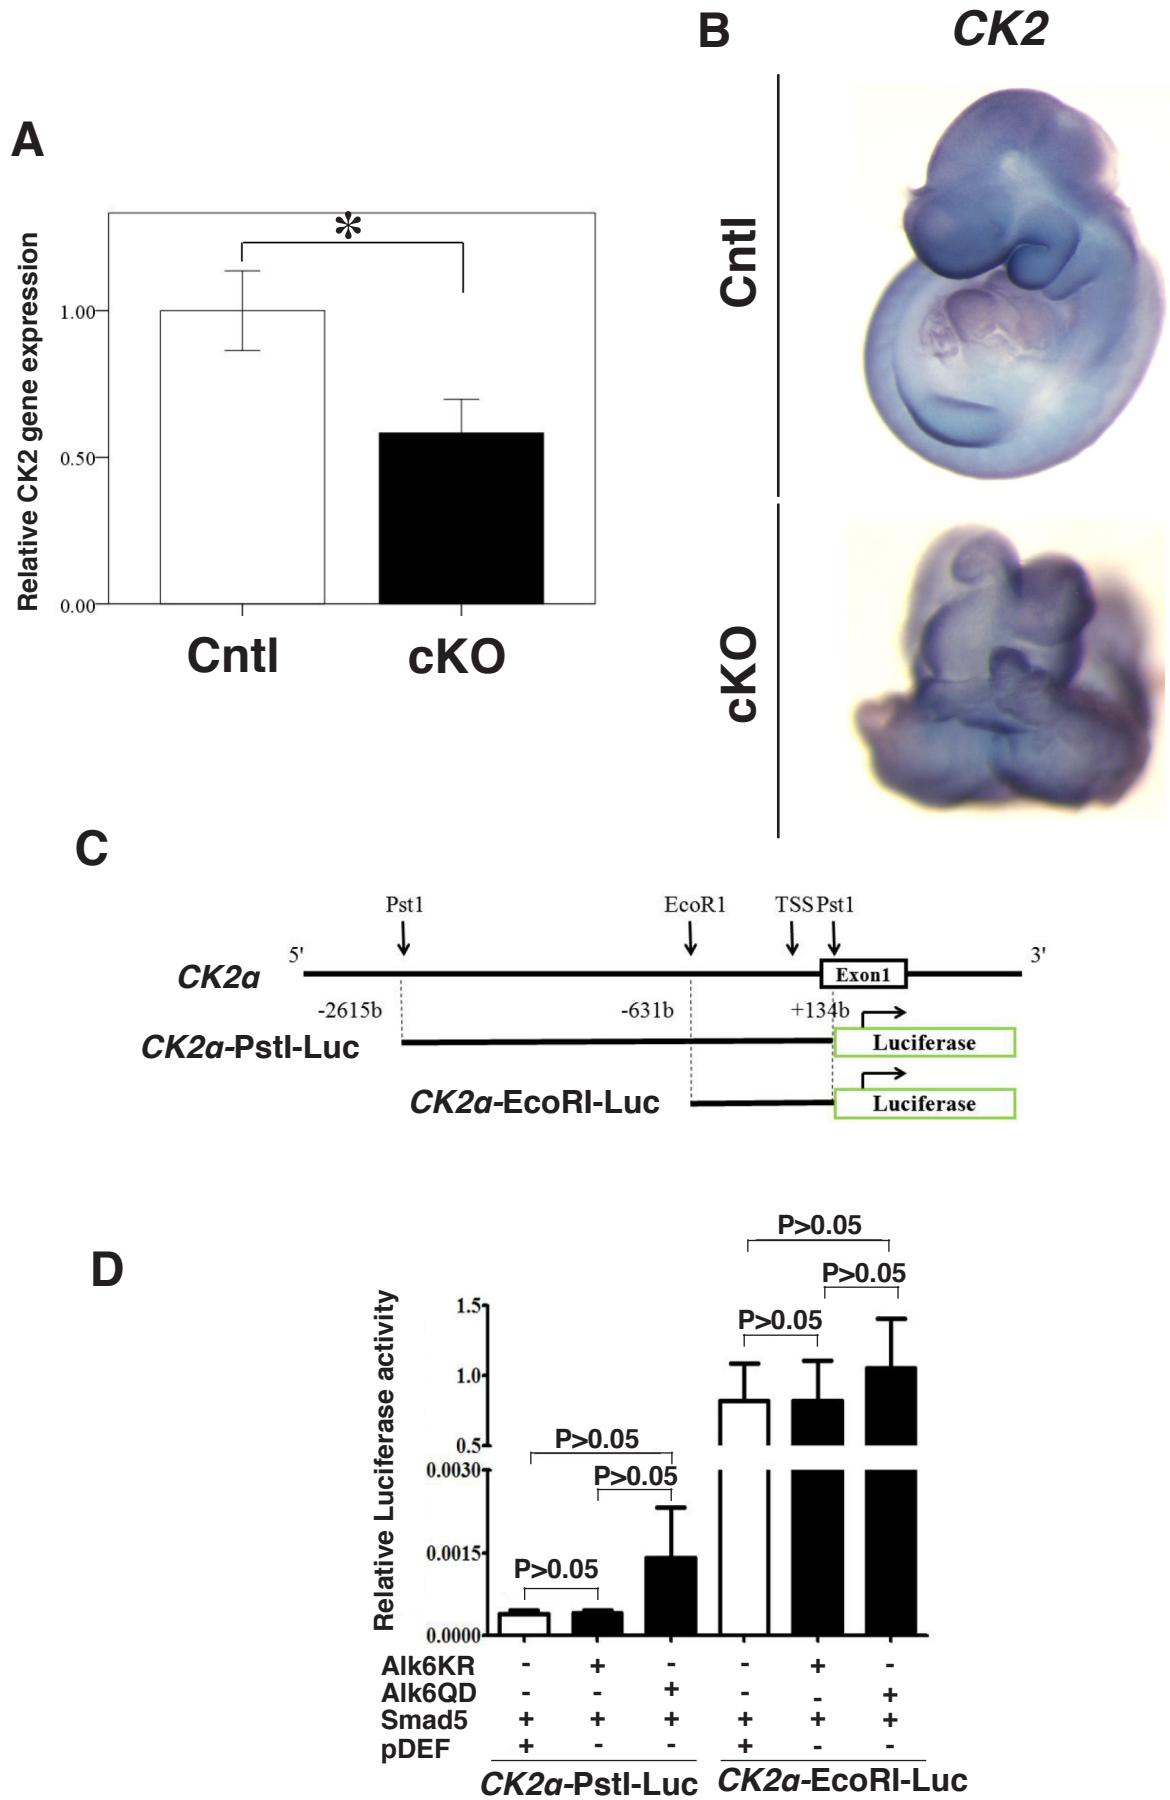

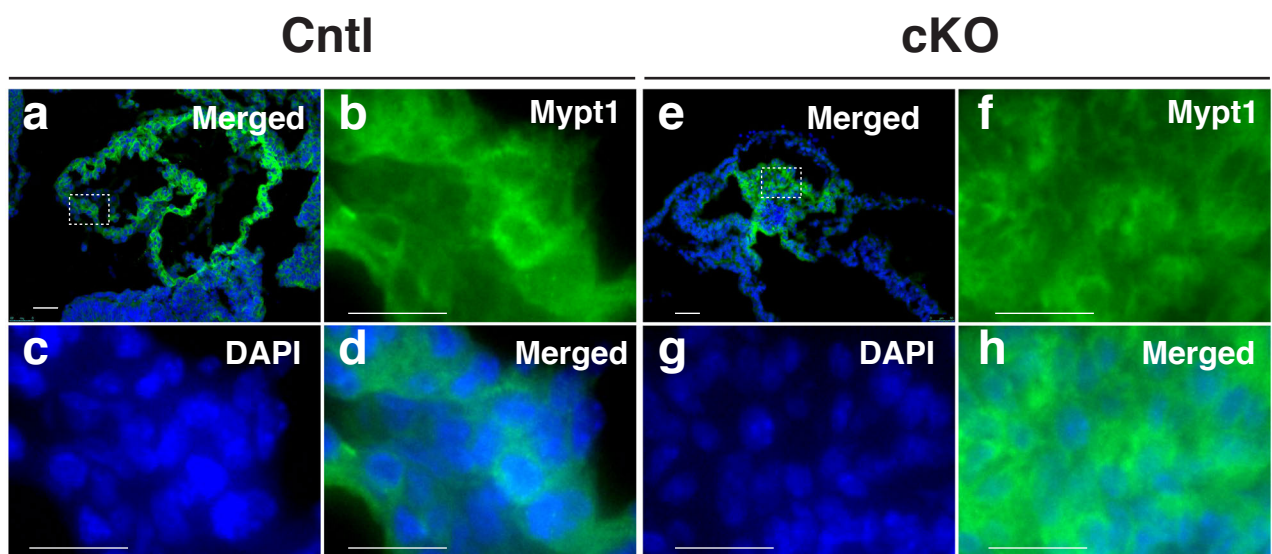



**A**

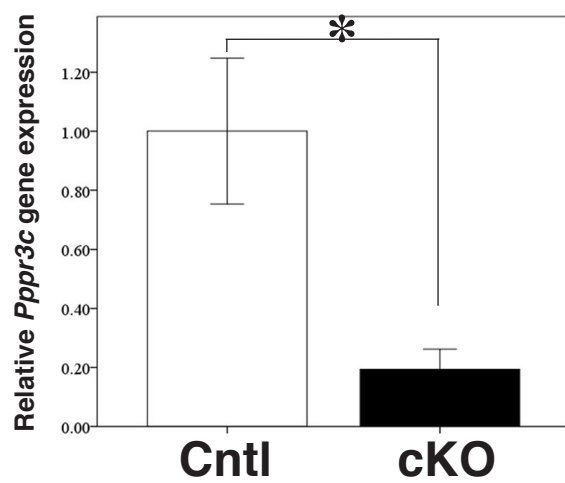

**B**

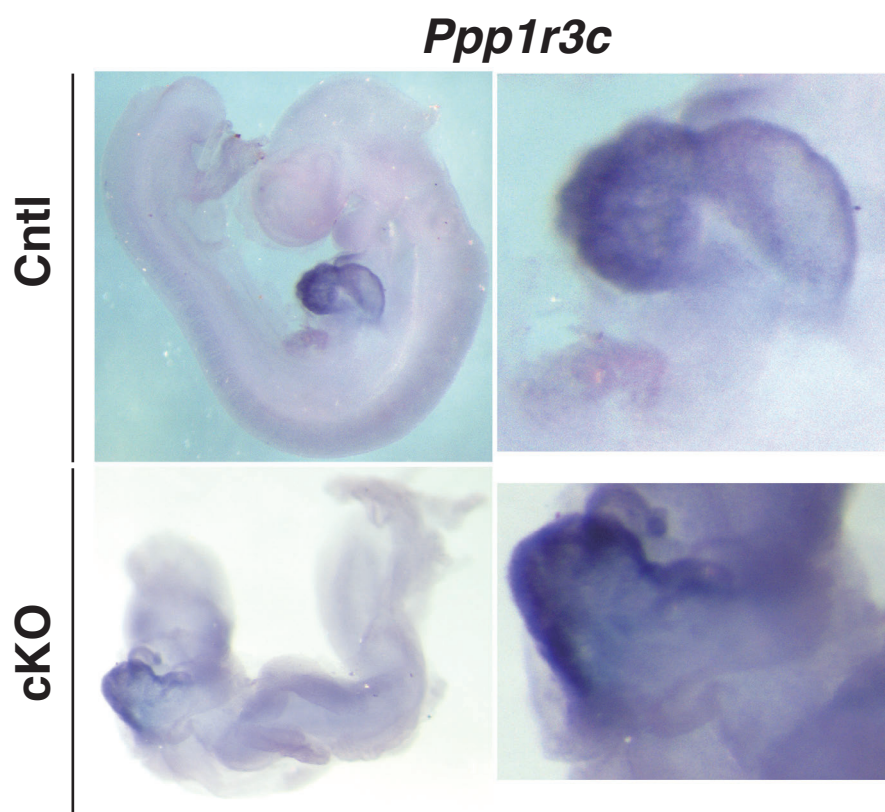

**A**

5min

**B**

1min

**C**

30 sec

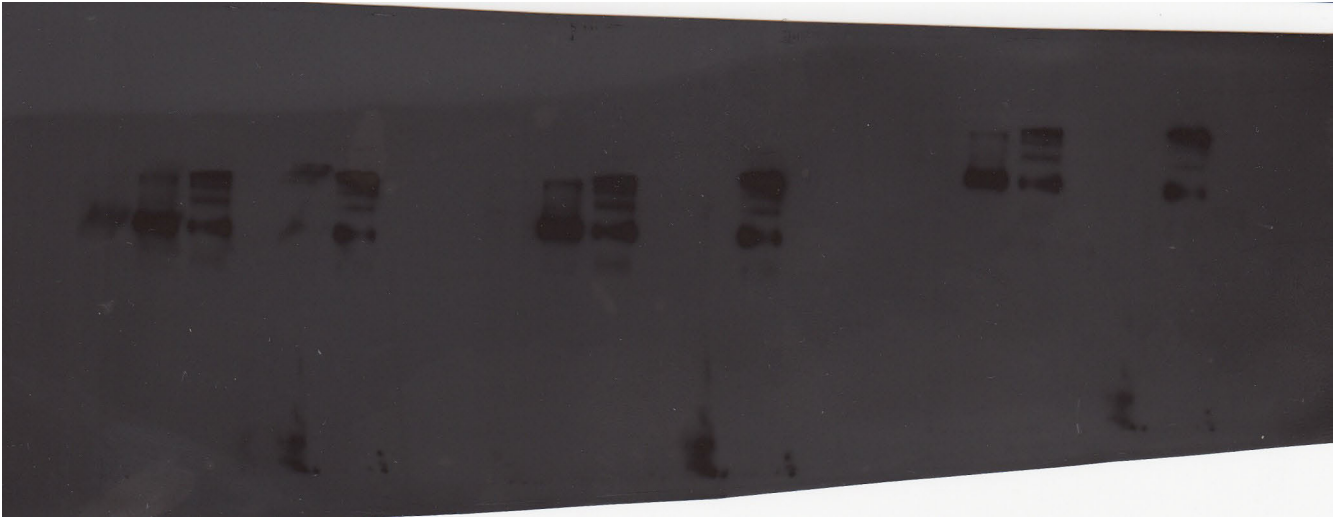

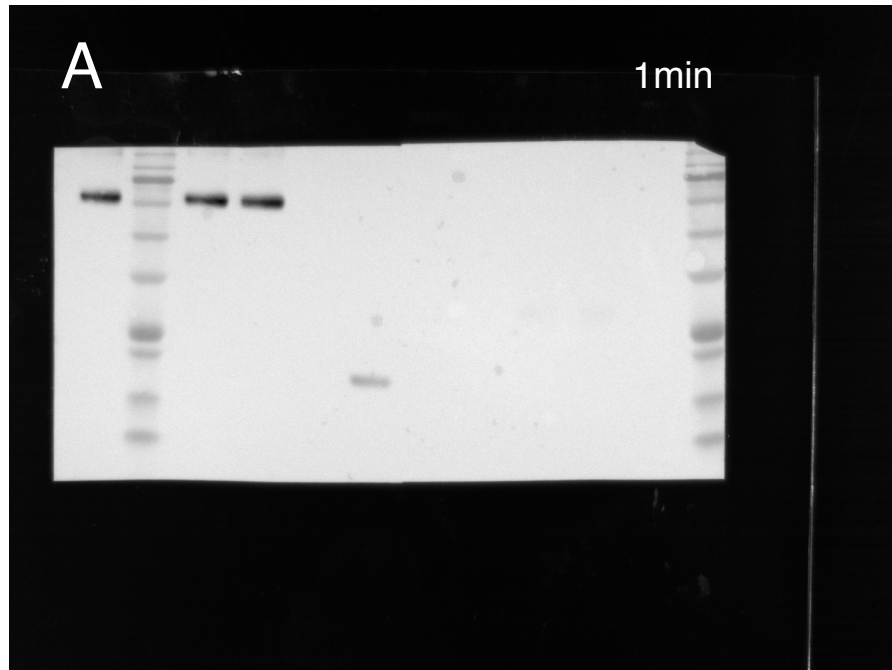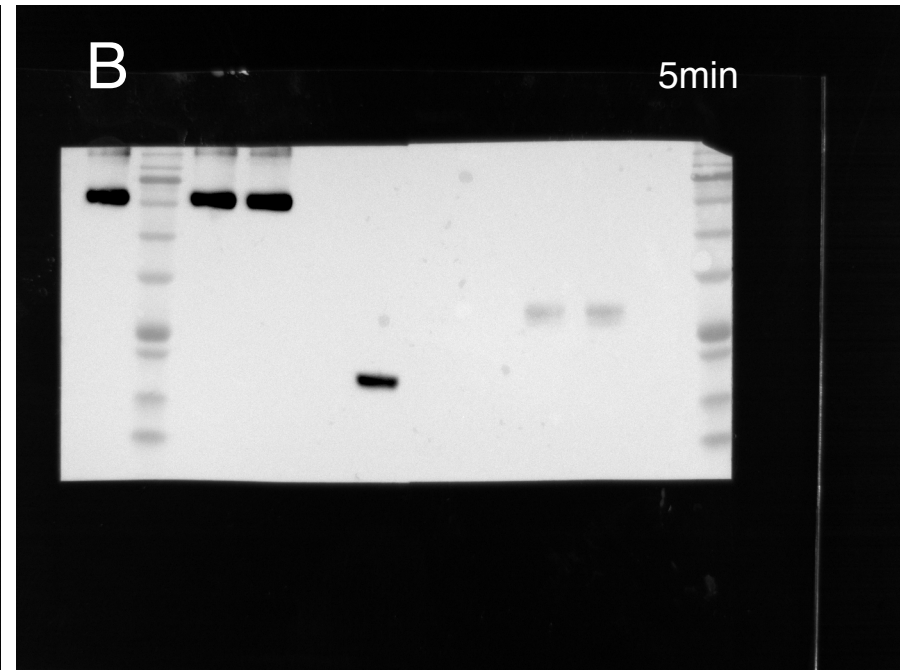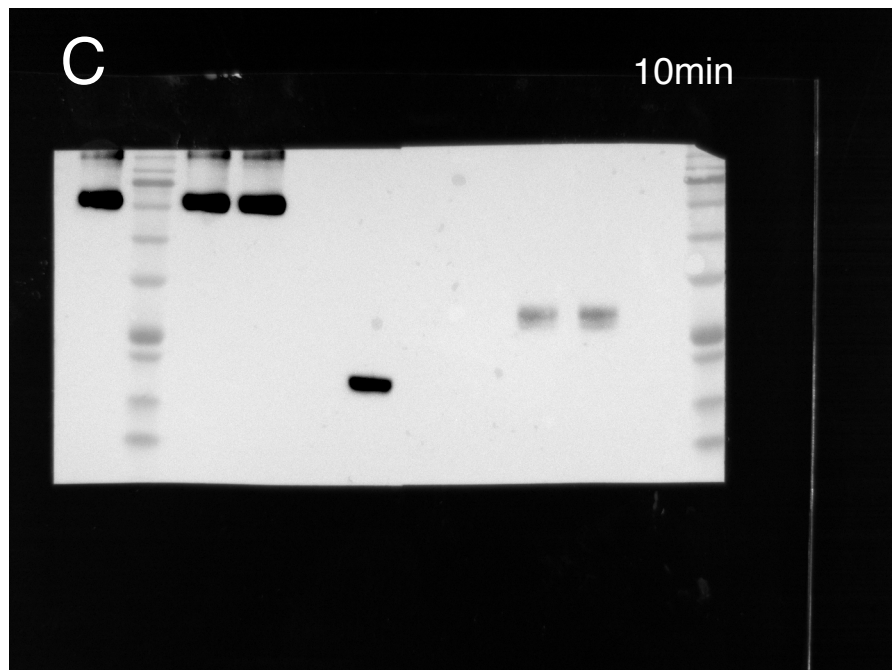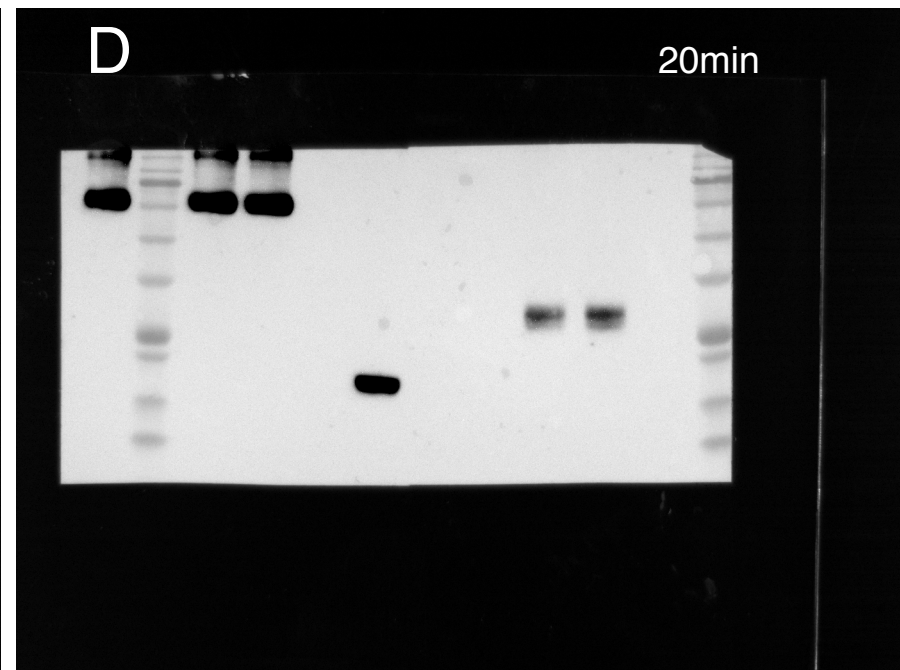

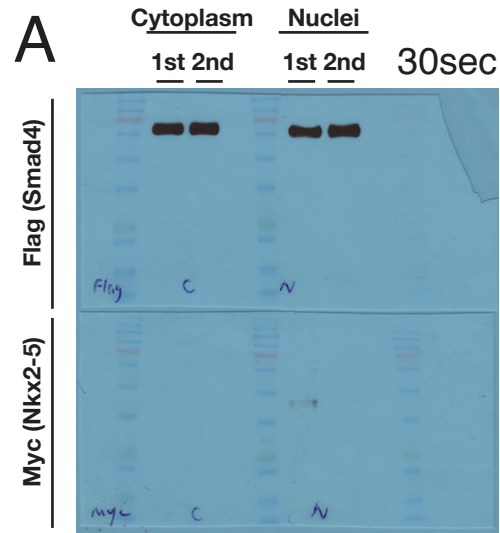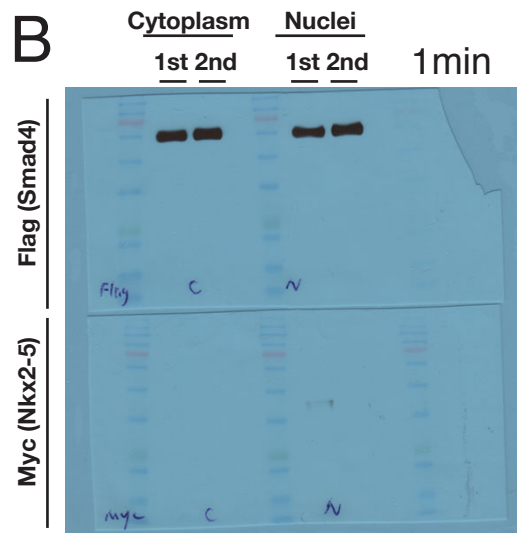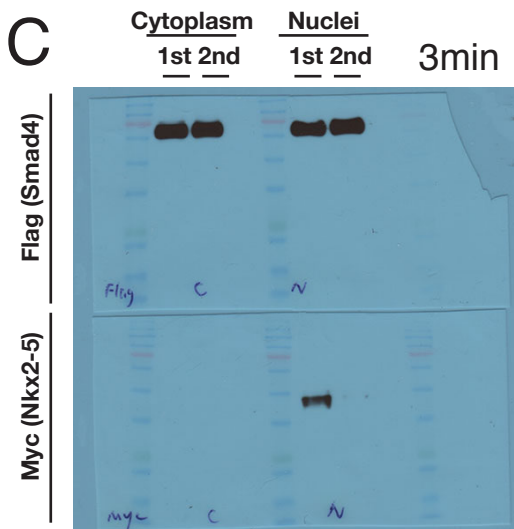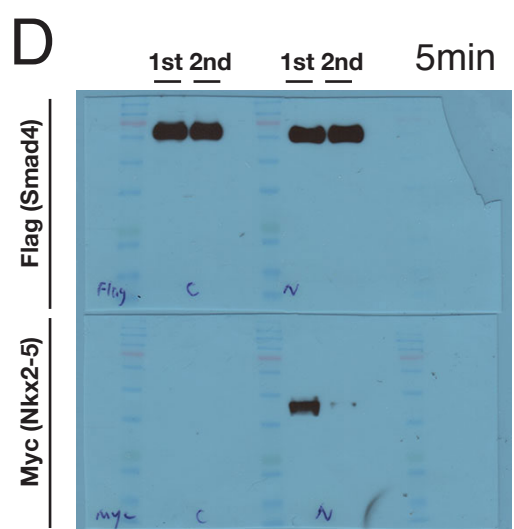

Supplement: 41598_2021_82954_MOESM1_ESM.pdf [file 41598_2021_82954_MOESM1_ESM.pdf]
